# Supplementary material
Source: PubMed Central journal article supplement (PMC6708385)
Supplement: pnas.1907968116.sapp.pdf [file pnas.1907968116.sapp.pdf]

## Supplementary Information for

CsBRC1 inhibits axillary bud outgrowth by directly repressing the auxin efflux carrier *CsPIN3* in cucumber

Junjun Shen<sup>a,\*</sup>, Yaqi Zhang<sup>a,\*</sup>, Danfeng Ge<sup>b,c</sup>, Zhongyi Wang<sup>a</sup>, Weiyuan Song<sup>a</sup>, Ran Gu<sup>a</sup>, Gen Che<sup>a</sup>, Zhihua Cheng<sup>a</sup>, Renyi Liu<sup>d</sup>, and Xiaolan Zhang<sup>a,#</sup>

\* These authors contributed equally to this work.

# Corresponding author: Xiaolan Zhang  
Email: zhxiaolan@cau.edu.cn

### **This PDF file includes:**

Figs. S1 to S6  
Tables S1 to S3  
Captions for databases S1

### **Other supplementary materials for this manuscript include the following:**

Datasets S1

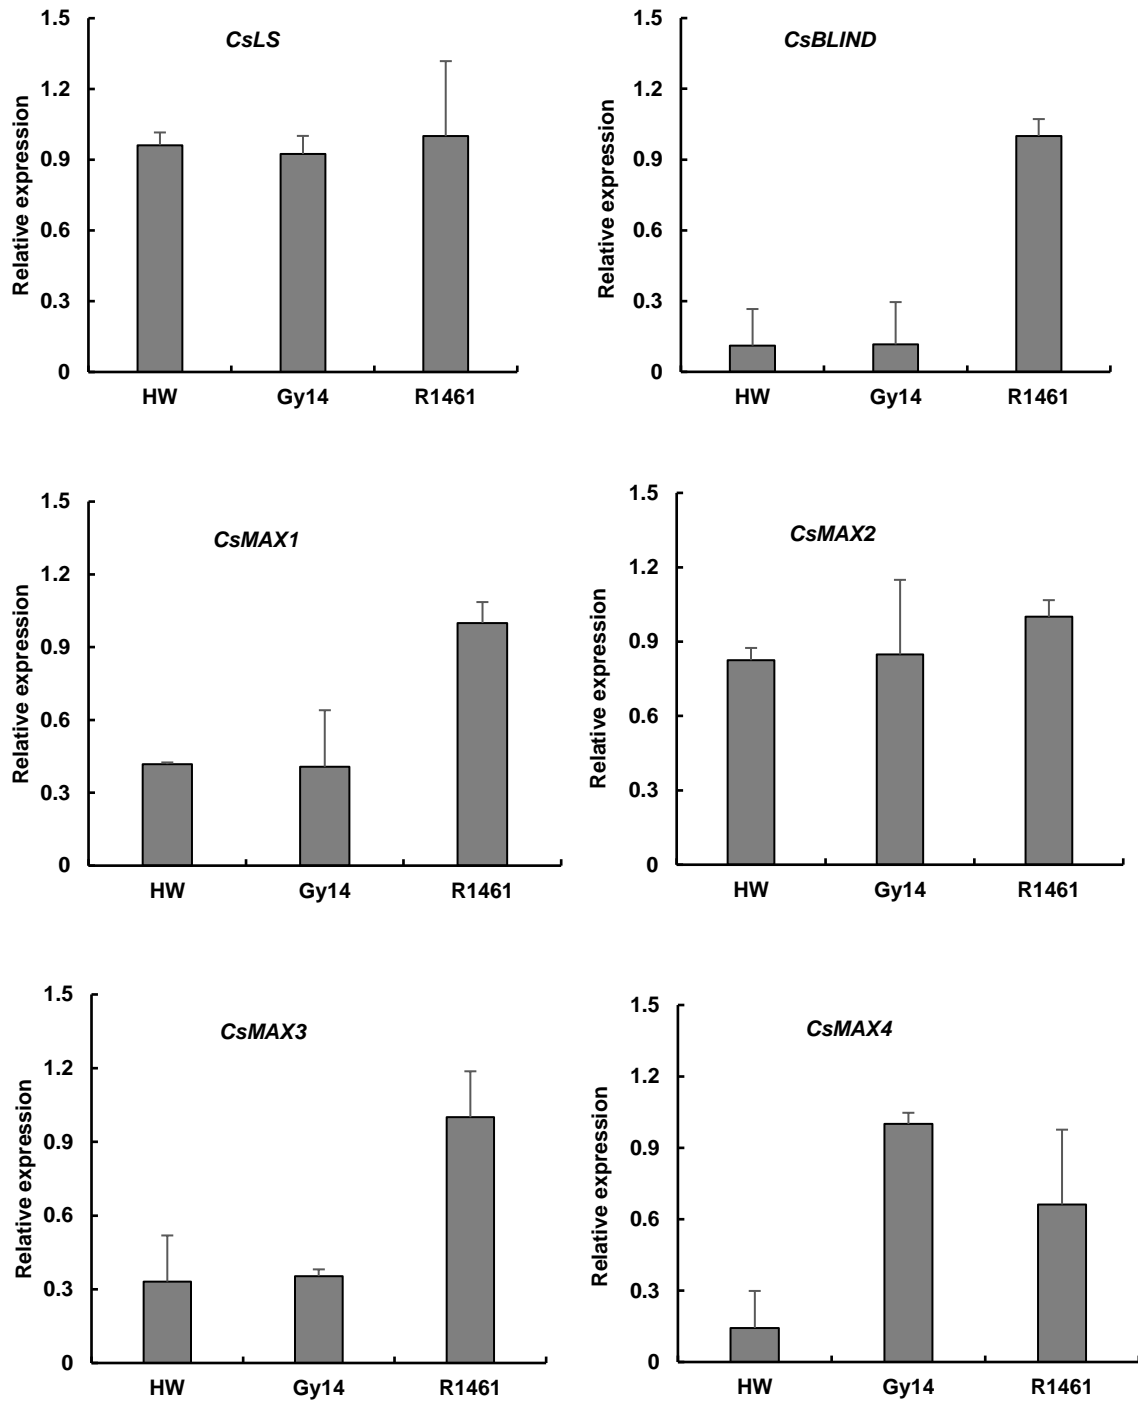

**Fig. S1.** Expression analyses of *CsLS* (*Csa3G039300*), *CsBLIND* (*Csa1G109320*), *CsMAX1* (*Csa4G646170*), *CsMAX2* (*Csa7G048640*), *CsMAX3* (*Csa6G106700*) and *CsMAX4* (*Csa2G373590*) by qRT-PCR in three cucumber lines. Values are means of three biological replicates of lateral buds from independent plants. Error bars represent  $\pm$ SD. HW, *hardwickii*.

|          |         | Basic         | Helix I      | Loop        | Helix II                  |                            |
|----------|---------|---------------|--------------|-------------|---------------------------|----------------------------|
| Monocots | ZmTB1   | TDRHSKIRTAQGV | RRMRLSVGVARE | FFALQDR     | LGFDKASKTVN               | WLLTQSKPAIDRLVD            |
|          | OsTB1   | KDRHSKIS      | TAGGMRDRR    | MRLSLDVARK  | FFALQDML                  | GFDKASKTVQWLLNMSKAAIREIMS  |
|          | SbTB1   | KDRHSKICTAG   | GMRDRR       | MRLSLDVARK  | FFALQDML                  | GFDKASKTVQWLLNTSKAAIQEIMA  |
|          | TaTB1   | TDRHSKIRTAQGV | RRMRLSLDVAR  | DFALQDQL    | GFDKASKTVDWLLTQSKPAIDRLSE |                            |
|          | CaTB1   | KDRHSKICTAG   | GMRDRR       | MRLSLDVARK  | FFALQDML                  | GFDKASKTVQWLLNTSKSAIQEIMT  |
| Eudicots | AtBRC1  | TDRHSKIKTAKG  | TRDRR        | MRLSLDVAKEL | FFGLQDML                  | GFDKASKTVEWLLTQAKPEIKIAT   |
|          | *CsBRC1 | RDRHSKINTLHG  | PRDRR        | MRLSLPVAKE  | FFGLQDML                  | GVDKASKTVEWLLFQARHAIKKLS-  |
|          | CmBRC1  | RDRHSKINTLHG  | PRDRR        | MRLSLPVAKE  | FFGLQDML                  | GVDKASKTVEWLLFQARHAIKKLS-  |
|          | NtBRC1  | KDRHSKINTAHG  | PRDRR        | MRLSLDVARK  | FFNLQDIL                  | LGFDKASKTVEWLLTKSKSAINELV- |
|          | SlBRC1  | KDRHSKINTARG  | PRDRR        | MRLSLDAARK  | FFRLQDIL                  | LGFDKASKTVEWLLTQSDSAIEELVA |
|          | StBRC1  | KDRHSKINTAHG  | PRDRR        | MRLSLEIARK  | FFNLQDIL                  | LGFDKASKTVEWLLTKSKSAVNDLV- |
|          | PsBRC1  | RDRHSKIKTAKG  | LDRDR        | MRLSLEVAKR  | FFGLQDML                  | GFDKASKTVDWLLNQSKDGIKQLAG  |
|          | GhBRC1  | TDRHSKINTANG  | PRDRR        | MRLSLDVARE  | FFGLQDML                  | GVDKASKTVEWLLVQAKPEITKLM-  |
|          | PeBRC1  | RDRHSKINTAQ   | GPRDRR       | MRLSLKVAARE | FFDLQDKL                  | RFDKASKTVEWLLIQAKNEIKKLS-  |

**Fig. S2.** Amino acid alignment of BRC1 and homologs from monocots and eudicots. Zm, *Zea mays*; Os, *Oryza sativa*; Sb, *Sorghum bicolor*; Ta, *Triticum aestivum*; Ca, *Cenchrus americanus*; At, *Arabidopsis thaliana*; Cs, *Cucumis sativus*; Cm, *Cucumis melo*; Nt, *Nicotiana tabacum*; Sl, *Solanum lycopersicum*; St, *Solanum tuberosum*; Ps, *Pisum sativum*; Gh, *Gossypium hirsutum*; Pe, *Populus euphratica*.

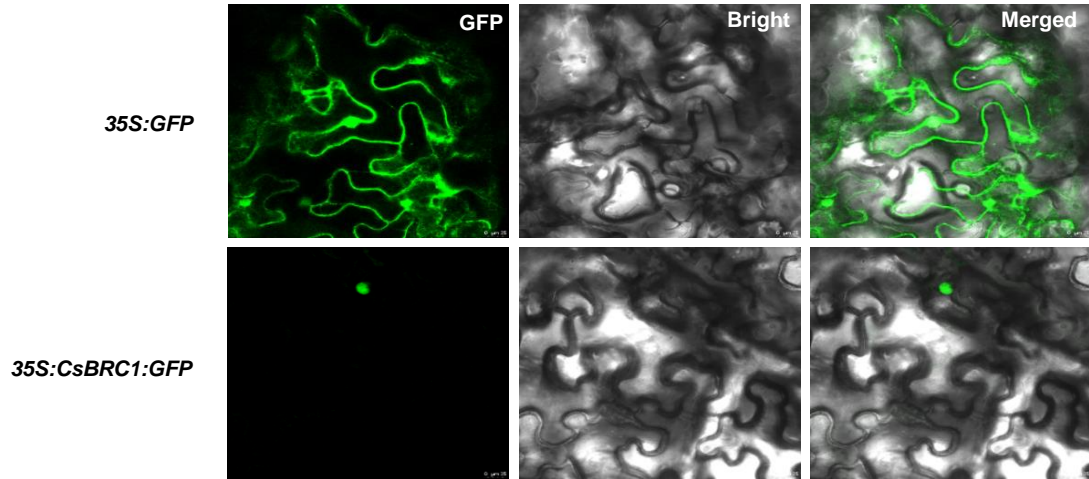

**Fig. S3.** Subcellular localization of CsBRC1 in tobacco leaves. GFP driven by the 35S promoter was used as a control. GFP is shown in green. The left, middle and right panels represent pictures taken under dark field, bright field and merge views, respectively.

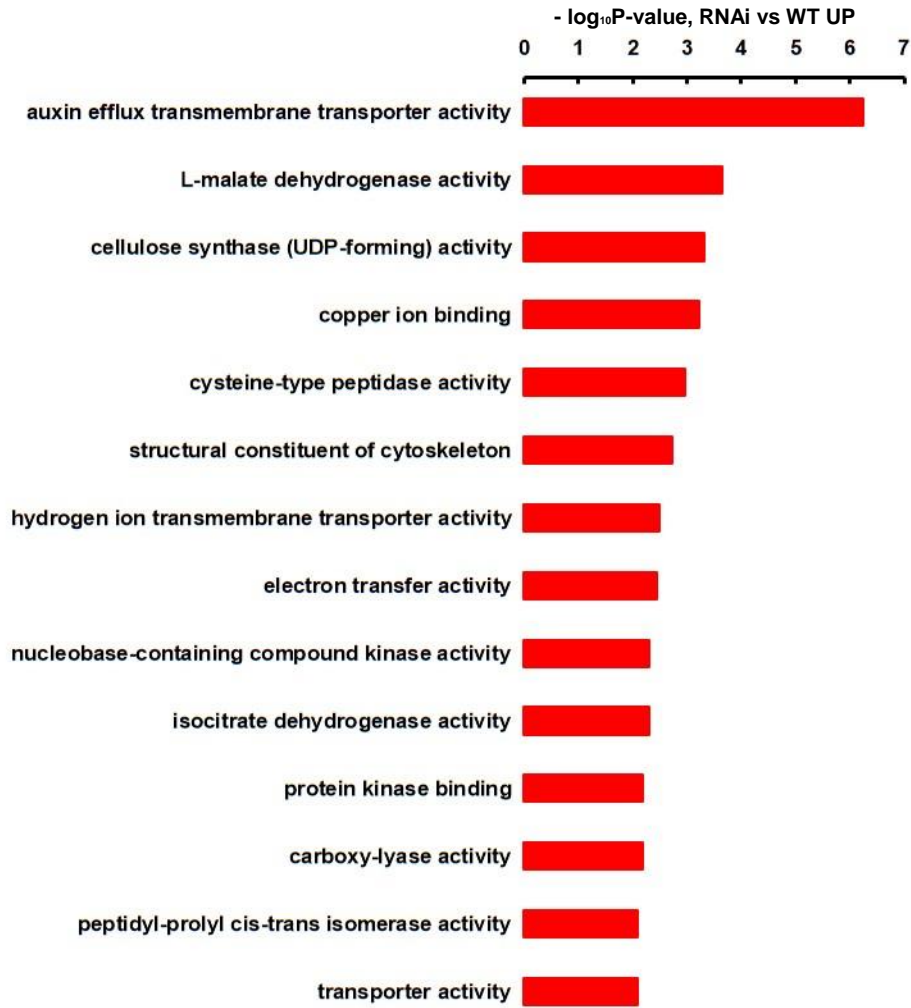

**Fig. S4.** Gene category enrichment of the up-regulated DEGs in axillary buds of *CsBRC1*-RNAi transgenic plants vs WT.

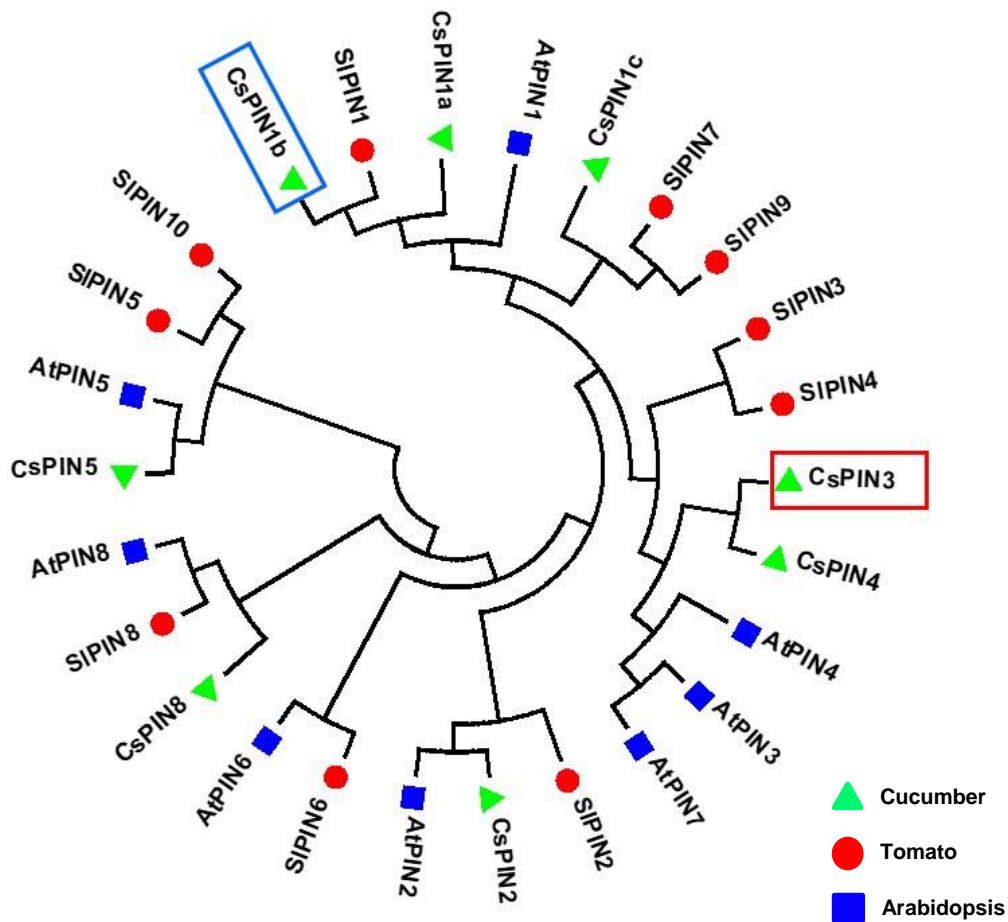

**Fig. S5.** Phylogenetic analysis of PIN family genes in cucumber, *Arabidopsis* and tomato. There are 8 PIN genes in *Arabidopsis* (blue square), 8 in cucumber (green triangle) and 10 in tomato (red circle). Blue and red squares indicate *CsPIN1b* and *CsPIN3*, respectively.

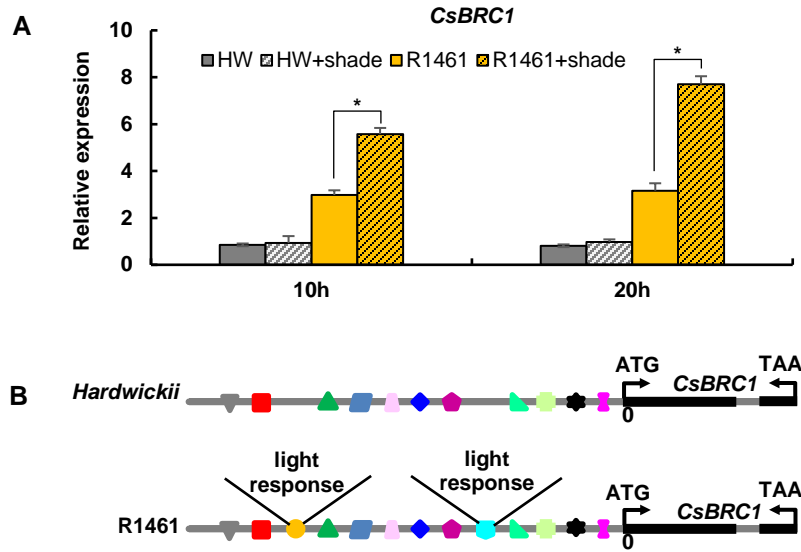

**Fig. S6.** Responses of *CsBRC1* expression to reduced light intensity in cucumber. (A) The relative expression level of *CsBRC1* in lateral buds upon shade treatment in *hardwickii* and R1461. Values are means of three biological replicates of lateral buds from independent plants. Error bars represent  $\pm$ SD. Significance analysis was conducted with the two-tailed Student's t-tests (\*  $P < 0.05$ ). (B) Schematic diagram of *cis*-acting regulatory elements on *CsBRC1* promoter in *hardwickii* and R1461. From left to right in *hardwickii*: AAGAA-motif, ABRE, ARE, CAAT-box, CAT-box, ERE, G-box, MYB, P-box, TATA-box and TCA-element. There are two additional light response elements in *CsBRC1* of R1461: AE-box and GATA-motif.

**Table S1. Summary of transcriptome sequencing data.**

| Sample id | Clean reads ratio | Clean bases ratio | Unique mapped reads ratio | Total mapped ratio |
|-----------|-------------------|-------------------|---------------------------|--------------------|
| WT-1      | 96.66%            | 94.24%            | 88.92%                    | 95.12%             |
| WT-2      | 96.09%            | 93.45%            | 87.77%                    | 93.70%             |
| RNAi-1    | 96.00%            | 93.51%            | 87.05%                    | 92.59%             |
| RNAi-2    | 95.79%            | 93.23%            | 87.46%                    | 93.60%             |



**Table S2. Gene information used in this study.**

| Gene name      | Species                     | Accession number |
|----------------|-----------------------------|------------------|
| <i>CsBRC1</i>  | <i>Cucumis sativus</i>      | Csa1G020890      |
| <i>CsLS</i>    | <i>Cucumis sativus</i>      | Csa3G039300      |
| <i>CsBLIND</i> | <i>Cucumis sativus</i>      | Csa1G109320      |
| <i>CsMAX1</i>  | <i>Cucumis sativus</i>      | Csa4G646170      |
| <i>CsMAX2</i>  | <i>Cucumis sativus</i>      | Csa7G048640      |
| <i>CsMAX3</i>  | <i>Cucumis sativus</i>      | Csa6G106700      |
| <i>CsMAX4</i>  | <i>Cucumis sativus</i>      | Csa2G373590      |
| <i>CsPIN1a</i> | <i>Cucumis sativus</i>      | Csa1G042820      |
| <i>CsPIN1b</i> | <i>Cucumis sativus</i>      | Csa1G025070      |
| <i>CsPIN1c</i> | <i>Cucumis sativus</i>      | Csa4G430820      |
| <i>CsPIN2</i>  | <i>Cucumis sativus</i>      | Csa1G427480      |
| <i>CsPIN3</i>  | <i>Cucumis sativus</i>      | Csa5G576590      |
| <i>CSPIN4</i>  | <i>Cucumis sativus</i>      | Csa5G284520      |
| <i>CSPIN5</i>  | <i>Cucumis sativus</i>      | Csa2G074170      |
| <i>CSPIN8</i>  | <i>Cucumis sativus</i>      | Csa3G827360      |
| <i>AtPIN1</i>  | <i>Arabidopsis thaliana</i> | At1G73590        |
| <i>AtPIN2</i>  | <i>Arabidopsis thaliana</i> | At5G57090        |
| <i>AtPIN3</i>  | <i>Arabidopsis thaliana</i> | At1G70940        |
| <i>AtPIN4</i>  | <i>Arabidopsis thaliana</i> | At2G01420        |
| <i>AtPIN5</i>  | <i>Arabidopsis thaliana</i> | At5G16530        |
| <i>AtPIN6</i>  | <i>Arabidopsis thaliana</i> | At1G77110        |
| <i>AtPIN7</i>  | <i>Arabidopsis thaliana</i> | At1G23080        |
| <i>AtPIN8</i>  | <i>Arabidopsis thaliana</i> | At5G15100        |
| <i>SIPIN1</i>  | <i>Solanum lycopersicum</i> | NM_001247234     |
| <i>SIPIN2</i>  | <i>Solanum lycopersicum</i> | NM_001247241     |
| <i>SIPIN3</i>  | <i>Solanum lycopersicum</i> | NM_001247248     |
| <i>SIPIN4</i>  | <i>Solanum lycopersicum</i> | NM_001247255     |
| <i>SIPIN5</i>  | <i>Solanum lycopersicum</i> | NM_001247263     |
| <i>SIPIN6</i>  | <i>Solanum lycopersicum</i> | NM_001247270     |
| <i>SIPIN7</i>  | <i>Solanum lycopersicum</i> | NM_001247275     |
| <i>SIPIN8</i>  | <i>Solanum lycopersicum</i> | NM_001247275     |
| <i>SIPIN9</i>  | <i>Solanum lycopersicum</i> | NM_001247291     |
| <i>SIPIN10</i> | <i>Solanum lycopersicum</i> | NM_001247301     |
| <i>AtBRC1</i>  | <i>Arabidopsis thaliana</i> | AT3G18550        |
| <i>CmBRC1</i>  | <i>Cucumis melo</i>         | XP_008453366     |
| <i>NtTB1</i>   | <i>Nicotiana tabacum</i>    | XP_016506815     |
| <i>SIBRC1</i>  | <i>Solanum lycopersicum</i> | NP_001234572     |
| <i>StBRC1</i>  | <i>Solanum tuberosum</i>    | XP_006341644     |
| <i>PsBRC1</i>  | <i>Pisum sativum</i>        | AEL12230         |
| <i>GhBRC1</i>  | <i>Gossypium hirsutum</i>   | AVA17437         |
| <i>PeBRC1</i>  | <i>Populus euphratica</i>   | XP_011012754     |
| <i>ZmTB1</i>   | <i>Zea mays</i>             | NP_001152465     |
| <i>OsTB1</i>   | <i>Oryza sativa</i>         | XP_015630237     |
| <i>SbTB1</i>   | <i>Sorghum bicolor</i>      | AAL75986         |
| <i>TaTB1</i>   | <i>Triticum aestivum</i>    | XP_020173868     |
| <i>CaTB1</i>   | <i>Cenchrus americanus</i>  | AAU89660         |

**Table S3. Primer information used in this study.**

| <b>Primers for <i>CsBRC1</i> amplification and vector construction</b>                                   |                                                       |
|----------------------------------------------------------------------------------------------------------|-------------------------------------------------------|
| <i>CsBRC1-clone-F</i>                                                                                    | ATGTTTGTGTTCAATAGTTGTAGTAAC                           |
| <i>CsBRC1-clone-R</i>                                                                                    | TTAAGTTTGTGATGTTTGGAAATTAC                            |
| <i>ProCsBRC1-clone-F</i>                                                                                 | ATACACACTATACATGTAAGTCGGAC                            |
| <i>ProCsBRC1-clone-R</i>                                                                                 | ATCTCTGATCTTTTAATCTCTCTTTT                            |
| <i>CsBRC1-Sense-F</i>                                                                                    | TTGGCGCGCCCTCTTTCAAGCTAGACATGCAA                      |
| <i>CsBRC1-Sense -R</i>                                                                                   | ATTTAAATAGTTTGTGATGTTTGGAAATTA                        |
| <i>CsBRC1-Antisense-F</i>                                                                                | GGACTAGTCTCTTTCAAGCTAGACATGCAA                        |
| <i>CsBRC1-Antisense-R</i>                                                                                | CGGGATCCAGTTTGTGATGTTTGGAAATTA                        |
| <i>CsPIN1b-clone-F</i>                                                                                   | ATGATTACATTATTAGACTTCTAC                              |
| <i>CsPIN1b-clone-R</i>                                                                                   | TCATAATCCCAACAAAATGTAGTA                              |
| <i>CsPIN1b-OV-F</i>                                                                                      | GCTCTAGAATGATTACATTATTAGACTTCTAC                      |
| <i>CsPIN1b-OV-R</i>                                                                                      | CGGGATCCTCATAATCCCAACAAAATGTAGTA                      |
| <i>CsPIN3-clone-F</i>                                                                                    | ATGATTTTCATGGAAGGATCTTTACACCG                         |
| <i>CsPIN3-clone-R</i>                                                                                    | TTACAGACCCAGCAGAACATAGTAGAGC                          |
| <i>CsPIN3-OV-F</i>                                                                                       | GCTCTAGAATGATTTTCATGGAAGGATCTTTACACCG                 |
| <i>CsPIN3-OV-R</i>                                                                                       | CGGGATCCTTACAGACCCAGCAGAACATAGTAGAGC                  |
| <i>CsBRC1-1300-F</i>                                                                                     | GCTCTAGAATGTTTGTGTTCAATAGTTGTAGTAAC                   |
| <i>CsBRC1-1300-R</i>                                                                                     | ACGCGTCGACAGTTTGTGATGTTTGGAAATTTACCTC                 |
| <b>Primers for qRT-PCR</b>                                                                               |                                                       |
| <i>CsBRC1-Q-F</i>                                                                                        | TCACGAGGGAGTGTAGGGAGAA                                |
| <i>CsBRC1-Q-R</i>                                                                                        | GCAATAAATAGAGTTGGAGGGGC                               |
| <i>CsLS-Q-F</i>                                                                                          | GGTTTCAGTTTCACCCTTTG                                  |
| <i>CsLS-Q-R</i>                                                                                          | CAATACTCGAACATCGTCCT                                  |
| <i>CsBLIND-Q-F</i>                                                                                       | AATAACATTAGCCCTAGCCC                                  |
| <i>CsBLIND-Q-R</i>                                                                                       | TCCAAACCCTAATAAGCAGC                                  |
| <i>CsMAX1-Q-F</i>                                                                                        | CATATCTACTCCACAACGCA                                  |
| <i>CsMAX1-Q-R</i>                                                                                        | CAGGACTTGTCTAAATGGCT                                  |
| <i>CsMAX2-Q-F</i>                                                                                        | GATGAAGTTGGATTGCAGTG                                  |
| <i>CsMAX2-Q-R</i>                                                                                        | GCCAATAATCGAGCTCTGTA                                  |
| <i>CsMAX3-Q-F</i>                                                                                        | AGCCTGTGCTATATGGAGTA                                  |
| <i>CsMAX3-Q-R</i>                                                                                        | GGTAGAAGCATATCCTCAGC                                  |
| <i>CsMAX4-Q-F</i>                                                                                        | GAAGCTGCATTATTTACCC                                   |
| <i>CsMAX4-Q-R</i>                                                                                        | CTTCTGATGGTGAAGTTGGA                                  |
| <i>CsPIN1b-Q-F</i>                                                                                       | GATTTTTACTCCATGATCGGC                                 |
| <i>CsPIN1b-Q-R</i>                                                                                       | ATGTTCCGGTGTAGGGTAATG                                 |
| <i>CsPIN3-Q-F</i>                                                                                        | CGAACACGTATTCAAGTCTG                                  |
| <i>CsPIN3-Q-R</i>                                                                                        | GCTAAACATAGCCATTCCAAG                                 |
| <i>CsUBIeq-Q-F</i>                                                                                       | CACCAAGCCCAAGAAGATC                                   |
| <i>CsUBI-eq-Q-R</i>                                                                                      | TAAACCTAATCACCACCAGC                                  |
| <b>Primers for <i>in situ</i> probes</b>                                                                 |                                                       |
| <i>CsBRC1-SP6</i>                                                                                        | GATTTAGGTGACACTATAGAATGCTATCAAGAACTCTCAAAGGATCAAC     |
| <i>CsBRC1-T7</i>                                                                                         | TGTAATACGACTCACTATAGGGGCAATAAATAGAGTTGGAGGGGC         |
| <i>CsPIN3-SP6</i>                                                                                        | GATTTAGGTGACACTATAGAATGCTATGATTTTCATGGAAGGATCTTTACACC |
| <i>CsPIN3-T7</i>                                                                                         | TGTAATACGACTCACTATAGGGCGGGGAGGAGGGCGGCGGTGGCTGAGG     |
| <b>Primers for yeast one-hybrid, LUC activity measure assay and Electrophoretic mobility shift assay</b> |                                                       |
| <i>ProCsPIN1b-P1-F</i>                                                                                   | AGCTTATTTGGGGTCCATTATTTGGGGTCCATTATTTGGGGTCCATTG      |
| <i>ProCsPIN1b-P1-R</i>                                                                                   | TCGACAATGGACCCCAATAATGGACCCCAATAATGGACCCCAATA         |
| <i>ProCsPIN3-P3A-F</i>                                                                                   | AGCTTGTAGGGGCCACCATGTAGGGGCCACCATGTAGGGGCCACCATG      |
| <i>ProCsPIN3-P3A-R</i>                                                                                   | TCGACTAGGTGGGCCCTACATGGTGGGCCCTACATGGTGGGCCCTACA      |
| <i>ProCsPIN3-P3B-F</i>                                                                                   | AGCTTAGAGGTCCCCTCCAGAGGTCCCCTCCAGAGGTCCCCTCCACTCCG    |
| <i>ProCsPIN3-P3B-R</i>                                                                                   | TCGACGGAGTGGGACCTCTGGAGTGGGACCTCTGGAGTGGGACCTCTA      |
| <i>ProCsPIN3-P3C-F</i>                                                                                   | AGCTTGAAGGACCCACAGGGAAGGACCCACAGGGAAGGACCCACAGGG      |

---

|                          |                                                     |
|--------------------------|-----------------------------------------------------|
| <i>ProCsPIN3-P3C-R</i>   | TCGACCCTGTGGGTCCTTCCCTGTGGGTCCTTCCCTGTGGGTCCTCA     |
| <i>ProCsPIN3-P3D-F</i>   | AGCTTTGAGGGCCAGTGGTGAGGGCCAGTGGTGAGGGCCAGTGGG       |
| <i>ProCsPIN3-P3D-R</i>   | TCGACCCTGTGGGTCCTTCCCTGTGGGTCCTTCCCTGTGGGTCCTCA     |
| <i>ProCsPIN3-P3E-F</i>   | AGCTTAGTGGGCCCCAAATGAGTGGGCCCCAAATGAGTGGGCCCCAAATGG |
| <i>ProCsPIN3-P3E-R</i>   | TCGACCATTTGGGCCCCACTCATTTGGGCCCCACTCATTTGGGCCCCACTA |
| <i>CsBRC1-AD-F</i>       | GGAATTCCATATGATGTTTGTGTTCAATAGTTGTAGTAA             |
| <i>CsBRC1-AD-R</i>       | CGGAATTCCTAAGTTTGTGATGTTTGGAAAT                     |
| <i>ProCsPIN1b-0800-F</i> | GGTATCGATAAGCTTTGACAAAATAATGCAAAGCTTCATC            |
| <i>ProCsPIN1b-0800-R</i> | AGAAGTAGTGGATCCTTTGAAAAGAAGTTTGAATTCAGAGAG          |
| <i>ProCsPIN3-0800-F</i>  | GGTATCGATAAGCTTCTTTCAATATTCATGGGTTTTGACC            |
| <i>ProCsPIN3-0800-R</i>  | AGAAGTAGTGGATCCGGCGGTTTTTGTGGTGAGTGGCAG             |
| <i>CsBRC1-62SK-F</i>     | GCTCTAGAATGTTTGTGTTCAATAGTTGTAGTAA                  |
| <i>CsBRC1-62SK-R</i>     | CGCGGATCCTTAAGTTTGTGATGTTTGGAAATTTACCTC             |
| <i>CsBRC1-MBP-F</i>      | CGGGATCCATGTTTGTGTTCAATAGTTGTAGT                    |
| <i>CsBRC1-MBP-R</i>      | ACGCGTCGACTTAAGTTTGTGATGTTTGGAAAT                   |
| <i>P1-CHIP-F</i>         | TTAAGAGAGAGTGTGGGAAAC                               |
| <i>P1-CHIP-R</i>         | TAGTGGGAAGAGGAGAAAAGG                               |
| <i>P3A-CHIP-F</i>        | GGATGTGAGTGAGAGAGGAT                                |
| <i>P3A-CHIP-R</i>        | AACCGCCTACTATGGTTAGTT                               |
| <i>P3B-CHIP-F</i>        | GGTCGATTGTCTAATTTCCG                                |
| <i>P3B-CHIP-R</i>        | TTGAGGCTGAACGGCAGAGT                                |
| <i>P3C-CHIP-F</i>        | TCAGCGGCAAAGAAGGGGAG                                |
| <i>P3C-CHIP-R</i>        | TGCGCCGGCGGAAACTTTCC                                |
| <i>P3DE-CHIP-F</i>       | AATCTTGGGCCTTGACCAGC                                |
| <i>P3DE-CHIP-R</i>       | GGACTGTACAATGGATGGCA                                |
| <i>P1-BIOTIN-F</i>       | GTGGGAAACAAAATTTGGGGTCCATTAATATATATAT               |
| <i>P1-BIOTIN-R</i>       | ATATATATATTTAATGGACCCCAAATTTTGTTCAC                 |
| <i>P3A-BIOTIN-F</i>      | CACTTGTGCAAAGTAGGGCCACCATAACCCGAATTGG               |
| <i>P3A-BIOTIN-R</i>      | CCAATTCGGGTTATGGTGGGCCCTACTTTGCACAAGTG              |
| <i>P3B-BIOTIN-F</i>      | GTTTCAGTCCTCCAGAGGTCCCACTCCCCGGCCGTCAA              |
| <i>P3B-BIOTIN-R</i>      | TTTGACGGCCGGGAGTGGGACCTCTGGAGGACTGAAC               |
| <i>P3C-BIOTIN-F</i>      | GATGATCAGAAAGAAGGACCCACAGGCTCAACAGGAGA              |
| <i>P3C-BIOTIN-R</i>      | TCTCCTGTTGAGCCTGTGGGTCCTTCTTTCTGATCATC              |
| <i>P1-M-F</i>            | GTGGGAAACAAAATTTGGGGAAGATTAATATATATAT               |
| <i>P1-M-R</i>            | ATATATATATTTAATCTTCCCAAATTTTGTTCAC                  |
| <i>P3A-M-F</i>           | CACTTGTGCAAAGTAGGGTGTACCATAACCCGAATTGG              |
| <i>P3A-M-R</i>           | CCAATTCGGGTTATGGTACACCCTACTTTGCACAAGTG              |
| <i>P3B-M-F</i>           | GTTTCAGTCCTCCAGAGGTGATACTCCCCGGCCGTCAA              |
| <i>P3B-M-R</i>           | TTTGACGGCCGGGAGTATCACCTCTGGAGGACTGAAC               |
| <i>P3C-M-F</i>           | GATGATCAGAAAGAAGGAAAGACAGGCTCAACAGGAGA              |
| <i>P3C-M-R</i>           | TCTCCTGTTGAGCCTGTCTTCCCTTCTTTCTGATCATC              |

---

**Additional dataset S1 (separate file)**

Dataset S1. List of genes that were differentially expressed in *CsBRC1*-RNAi plants.
